# Supplementary material for: Thermochromic Silks for Temperature Management and Dynamic Textile Displays
Source: PubMed Central journal article supplement (PMC8187528; doi:10.1007/s40820-021-00591-w), 2021-02-14
Supplement: 40820_2021_591_MOESM6_ESM.pdf [file 40820_2021_591_MOESM6_ESM.pdf]

Supporting Information for

## **Thermochromic Silks for Temperature Management and Dynamic Textile Displays**

Yang Wang<sup>1, #</sup>, Jing Ren<sup>1, #</sup>, Chao Ye<sup>1</sup>, Ying Pei<sup>2</sup>, Shengjie Ling<sup>1, \*</sup>

<sup>1</sup>School of Physical Science and Technology, ShanghaiTech University, 393 Middle Huaxia Road, Shanghai 201210, P. R. China

<sup>2</sup>School of Materials Science and Engineering, Zhengzhou University, Zhengzhou, P. R. China

<sup>#</sup>Yang Wang and Jing Ren contributed equally to this work

<sup>\*</sup>Corresponding author. E-mail: [lingshj@shanghaitech.edu.cn](mailto:lingshj@shanghaitech.edu.cn) (Shengjie Ling)

### **Supplementary Tables and Figures**

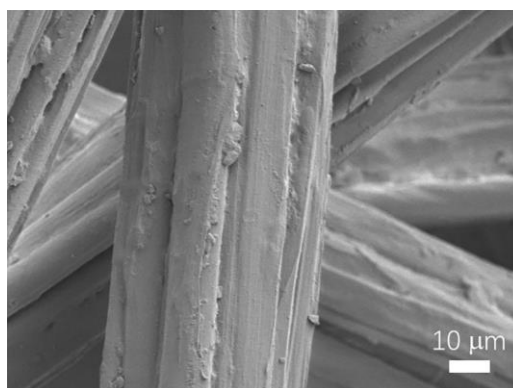

**Fig. S1** SEM image of purchased silkworm fibers

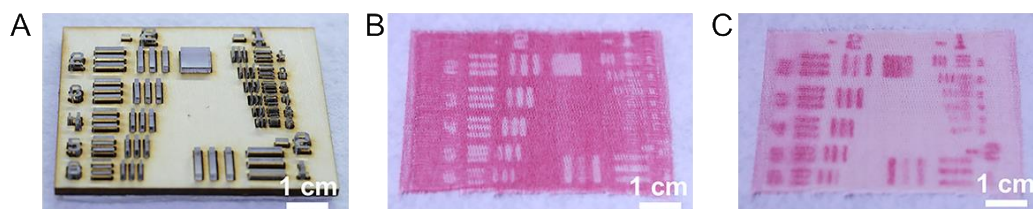

**Fig. S2** Coloring accuracy of the TCS fabric. **A**) Photograph of a mold with the smallest accuracy of 0.5 mm used for the thermal and cold induction of the fabric. **B**, **C**) After the mold was heated or cooled, it was pressed on the fabric so that the high-temperature (**B**) and low-temperature (**C**) response areas appeared on the fabric

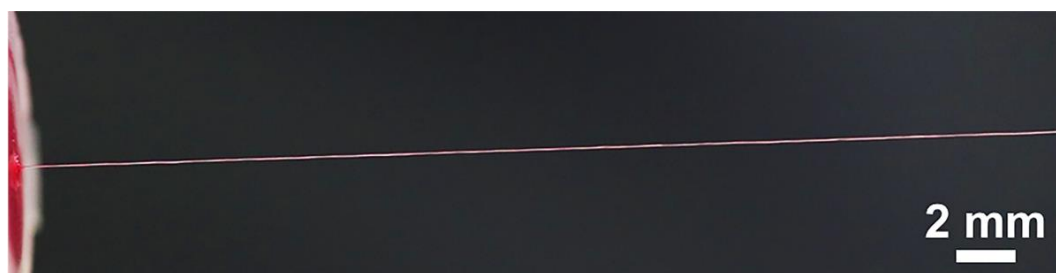

**Fig. S3** Photograph of uniform coating formed on the silk fiber when using an aqueous-based ink

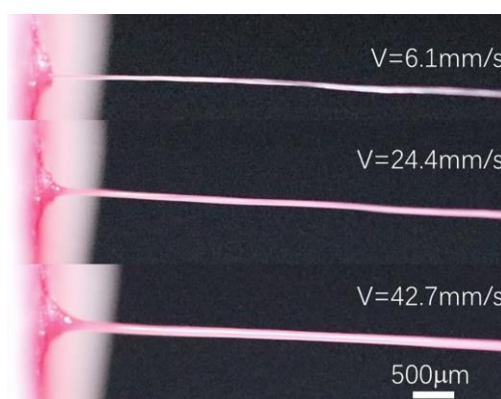

**Fig. S4** Photographs of coating layer with different thickness formed on the silk fiber when using an oily-based ink (58.6 wt%) at different coating speed

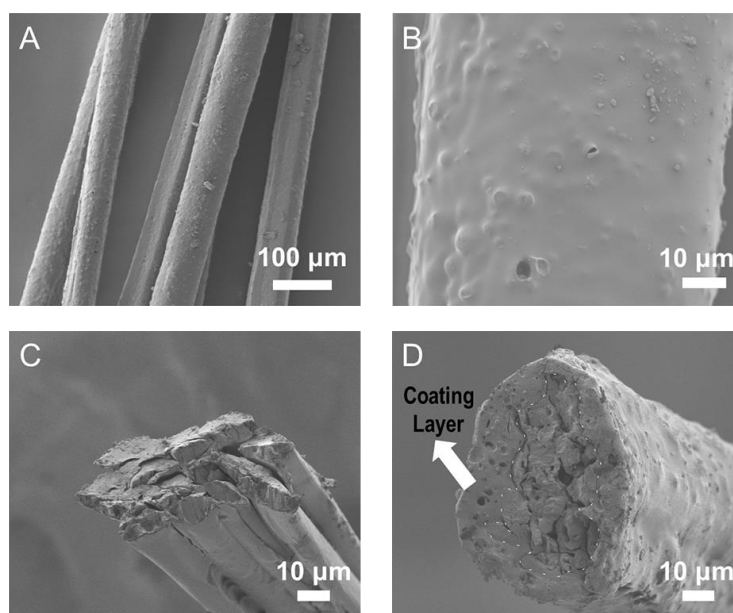

**Fig. S5** Surface SEM images of TCS fibers (A, B) and cross-sectional SEM images of silk fiber (C) and TCS fiber (D). dots in D indicate the boundary between the coating layer and the core fibers

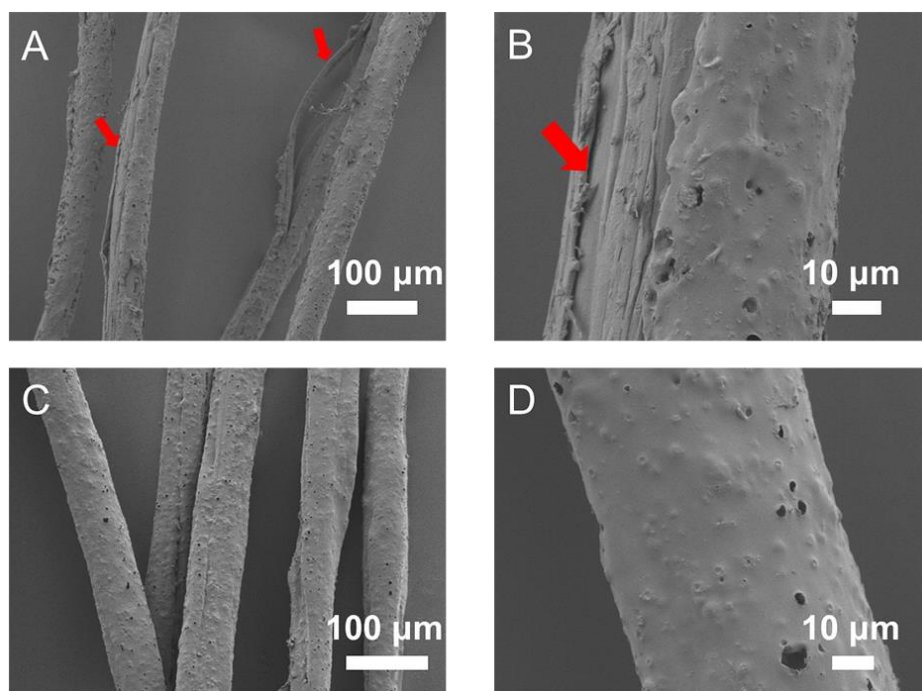

**Fig. S6** SEM images of TCS fibers without (A, B) and with (C, D) HFIP pretreatment after stirred with soap for 48 hours. The red arrows indicate the surface damaged area

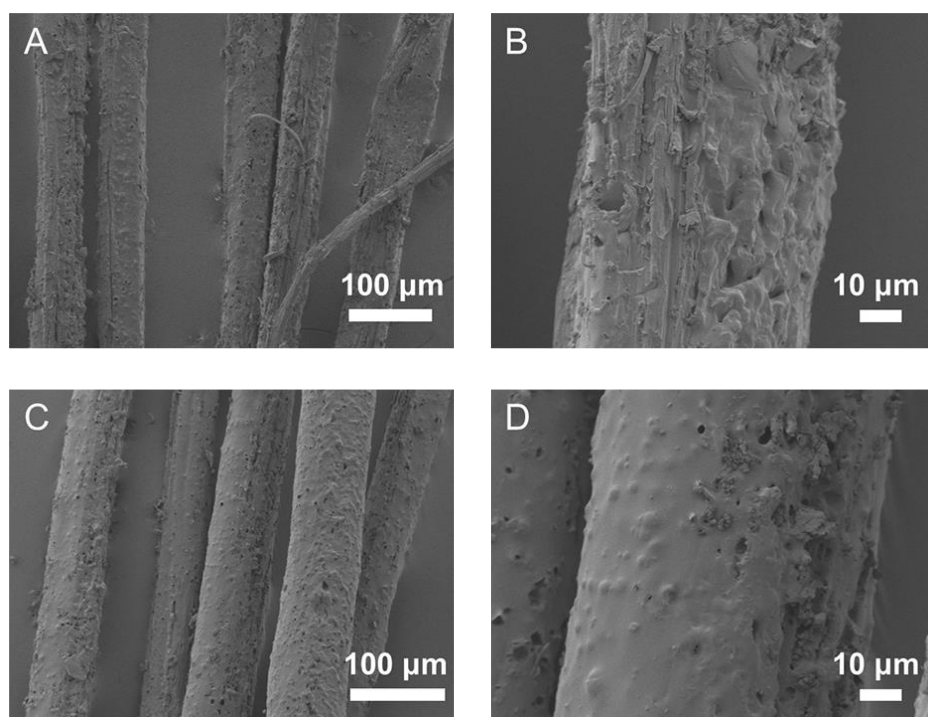

**Fig. S7** SEM images of TCS fibers without (A, B) and with (C, D) HFIP pretreatment after rubbed with sandpaper for ten times

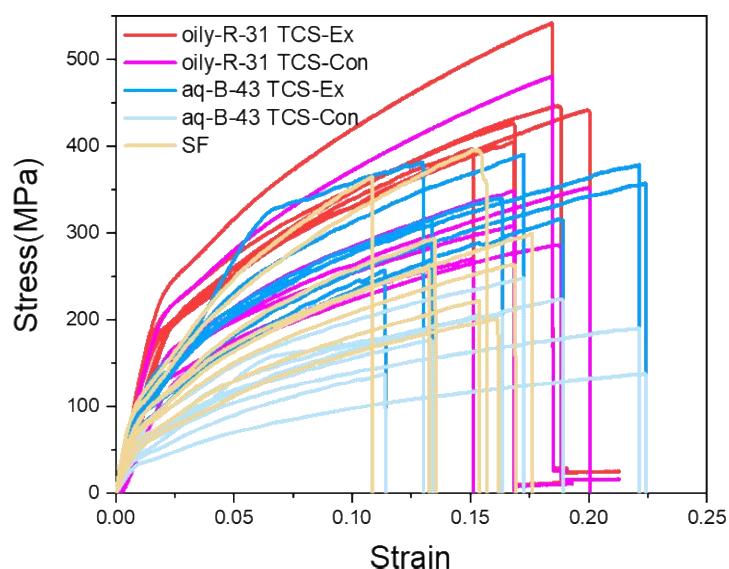

**Fig. S8** Stress-strain curves of the natural silk fiber and TCS with a tensile speed of  $2 \text{ mm min}^{-1}$ . Oily-Re-31 TCS-Ex and TCS-Con refer to the TCS coating with oily-Re-31 ink. aq-BI-43 TCS-Ex and TCS-Con refer to the TCS coating with aq-BI-43 ink

-Ex means that the stress was calculated excluding the cross-sectional area of the coating layer; -Con means that the stress was calculated containing the cross-sectional area of the coating layer.

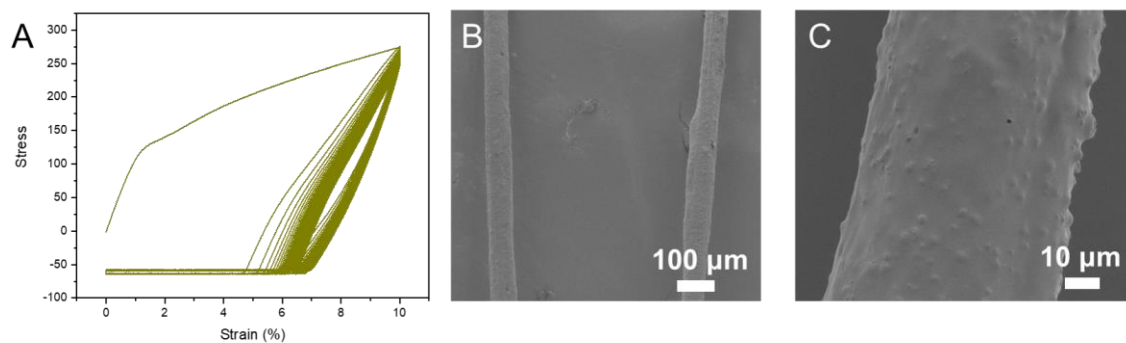

**Fig. S9** Stress-strain curve of TCS with 50 cycles of stretching-releasing at a tensile speed of  $2 \text{ mm min}^{-1}$  (A) and SEM images of TCS fiber after 50 cycles of stretching-releasing (B, C)

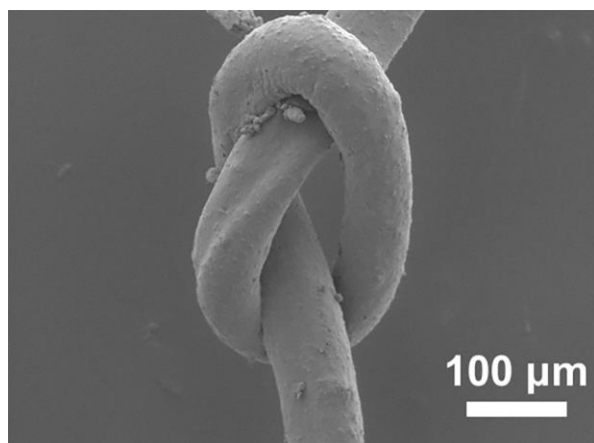

**Fig. S10** SEM image of a TCS fiber knot

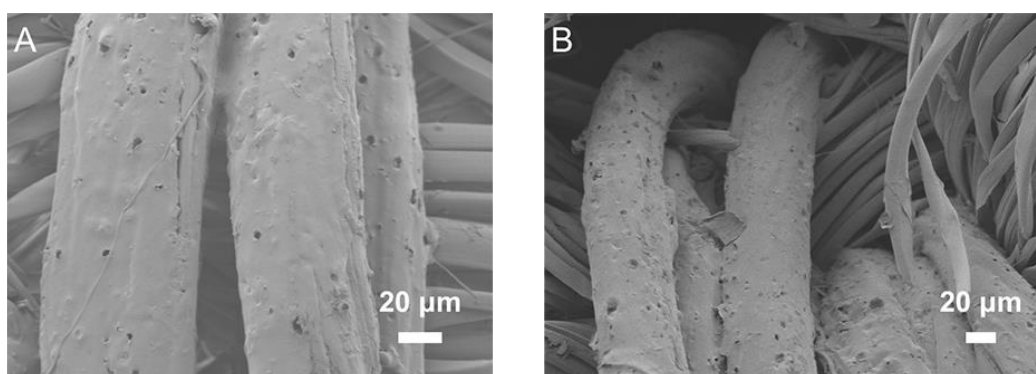

**Fig. S11** High-resolution SEM image of TCS yarns on the substrate fabric after machine washing process for one time (**A**), and ten times and stirring with soapy water for another 48 hours (**B**)

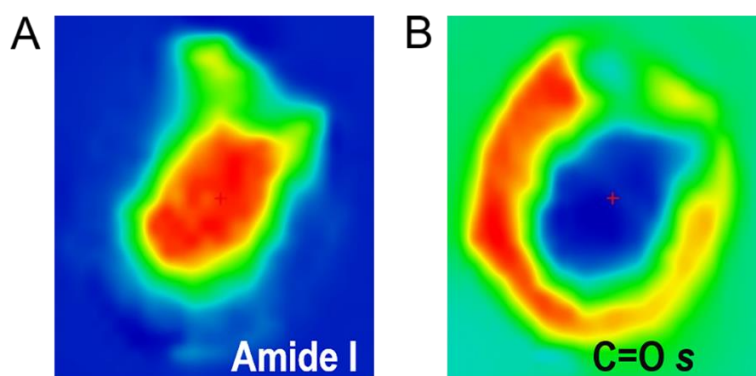

**Fig. S12** S-FTIR spectroscopic images of TCS slice by integrating the characteristic peak of the silk at  $1656\text{ cm}^{-1}$  (amide I, **A**) and the peak of inks at  $1729\text{ cm}^{-1}$  (C=O stretching, **B**) after washing

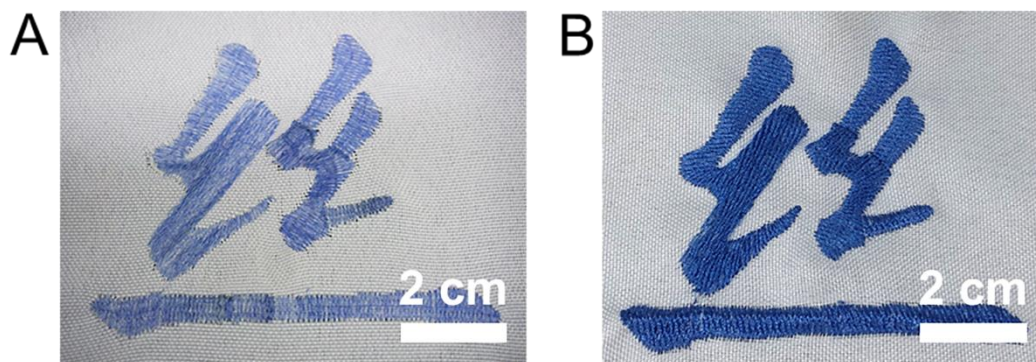

**Fig. S13** Photographs of TCS (A) and PET (B) Chinese “silk” characters on PET fabrics

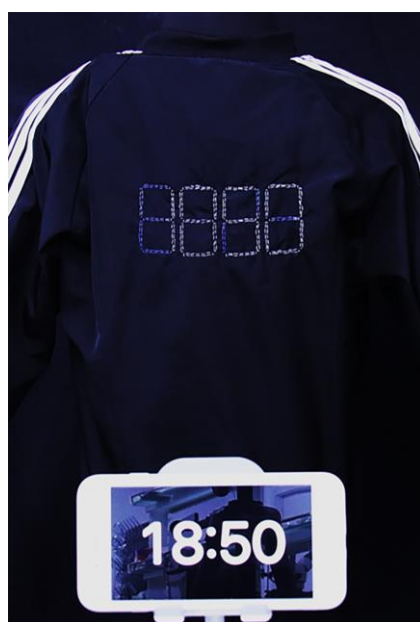

**Fig. S14** Real display of digital fabric showing real time synchronized with mobile phone

**Table S1** Physical properties of the PVC inks of different mass concentration (at 25°C)

| Concentration (%) | $\rho$ (Kg m <sup>3</sup> ) | $\eta$ (Kg m <sup>-1</sup> s <sup>-1</sup> ) | $\gamma$ (Kg s <sup>-2</sup> ) | a (m)   |
|-------------------|-----------------------------|----------------------------------------------|--------------------------------|---------|
| 51.9              | 948                         | 0.11                                         | 0.0330                         | 0.00189 |
| 58.6              | 981                         | 0.3                                          | 0.0305                         | 0.00178 |
| 67.2              | 992                         | 0.762                                        | 0.0294                         | 0.00174 |
| 72.5              | 1008                        | 1.491                                        | 0.0259                         | 0.00162 |
| 78.8              | 1029                        | 4.465                                        | 0.0312                         | 0.00176 |

**Table S2** Different spinning parameters for PVC ink of different mass concentration to obtain TCS with a stable and unstable coating layer

| Concentration (%) | U (mm s <sup>-1</sup> ) | Ca    | $e_0/b$ | condition |
|-------------------|-------------------------|-------|---------|-----------|
| 51.9              | 9.3                     | 0.031 | 0.063   | stable    |
|                   | 37.2                    | 0.124 | 0.188   | stable    |
|                   | 60.5                    | 0.201 | 0.438   | unstable  |
| 58.6              | 6.1                     | 0.060 | 0.114   | stable    |
|                   | 24.4                    | 0.240 | 0.421   | stable    |
|                   | 42.7                    | 0.420 | 0.728   | unstable  |
| 67.2              | 6.1                     | 0.158 | 0.218   | stable    |
|                   | 12.2                    | 0.317 | 0.506   | stable    |
|                   | 18.3                    | 0.475 | 0.649   | unstable  |
| 72.5              | 3.05                    | 0.176 | 0.219   | stable    |
|                   | 9.76                    | 0.563 | 0.651   | stable    |
|                   | 15.25                   | 0.879 | 0.938   | unstable  |
| 78.8              | 1.22                    | 0.175 | 0.295   | stable    |
|                   | 4.27                    | 0.559 | 0.611   | stable    |
|                   | 6.1                     | 0.872 | 0.824   | unstable  |

**Table S3** Comparison of mechanical properties of natural silk fibers and different TCS fibers

| Materials          | Strength (MPa) | Strain (%) | Modulus (GPa) | Toughness (MJ/m <sup>3</sup> ) |
|--------------------|----------------|------------|---------------|--------------------------------|
| natural silk fiber | 287.2 ± 58.8   | 14.8 ± 2.1 | 10.7 ± 2.7    | 27.2 ± 6.6                     |
| aq-BI-43 TCS-1     | 187.8 ± 36.0   | 16.8 ± 3.9 | 6.2 ± 1.1     | 21.4 ± 7.1                     |
| aq-BI-43 TCS-2     | 342.0 ± 40.0   | 16.8 ± 3.9 | 10.9 ± 0.6    | 39.3 ± 12.5                    |
| oily-Re-31 TCS-1   | 341.0 ± 64.3   | 17.6 ± 1.5 | 8.9 ± 1.4     | 43.2 ± 9.8                     |
| oily-Re-31 TCS-2   | 443.1 ± 44.2   | 17.6 ± 1.5 | 11.9 ± 1.2    | 56.0 ± 8.5                     |
